# Supplementary material for: Kinome-wide shRNA Screen Identifies the Receptor Tyrosine Kinase AXL as a Key Regulator for Mesenchymal Glioblastoma Stem-like Cells
Source: PubMed Central journal article supplement — Stem Cell Reports. 2015 Apr 23;4(5):899–913. doi: 10.1016/j.stemcr.2015.03.005 (PMC4437464; doi:10.1016/j.stemcr.2015.03.005), 2015-04-23
Supplement: mmc1.pdf [file mmc1.pdf]

**Stem Cell Reports, Volume 4**

**Supplemental Information**

**Kinome-wide shRNA Screen Identifies the  
Receptor Tyrosine Kinase *AXL* as a Key Regulator  
for Mesenchymal Glioblastoma Stem-like Cells**

**Peng Cheng, Emma Phillips, Sung-Hak Kim, David Taylor, Thomas Hielscher, Laura Puccio, Anita Hjelmeland, Peter Lichter, Ichiro Nakano, and Violaine Goidts**



Figure S2

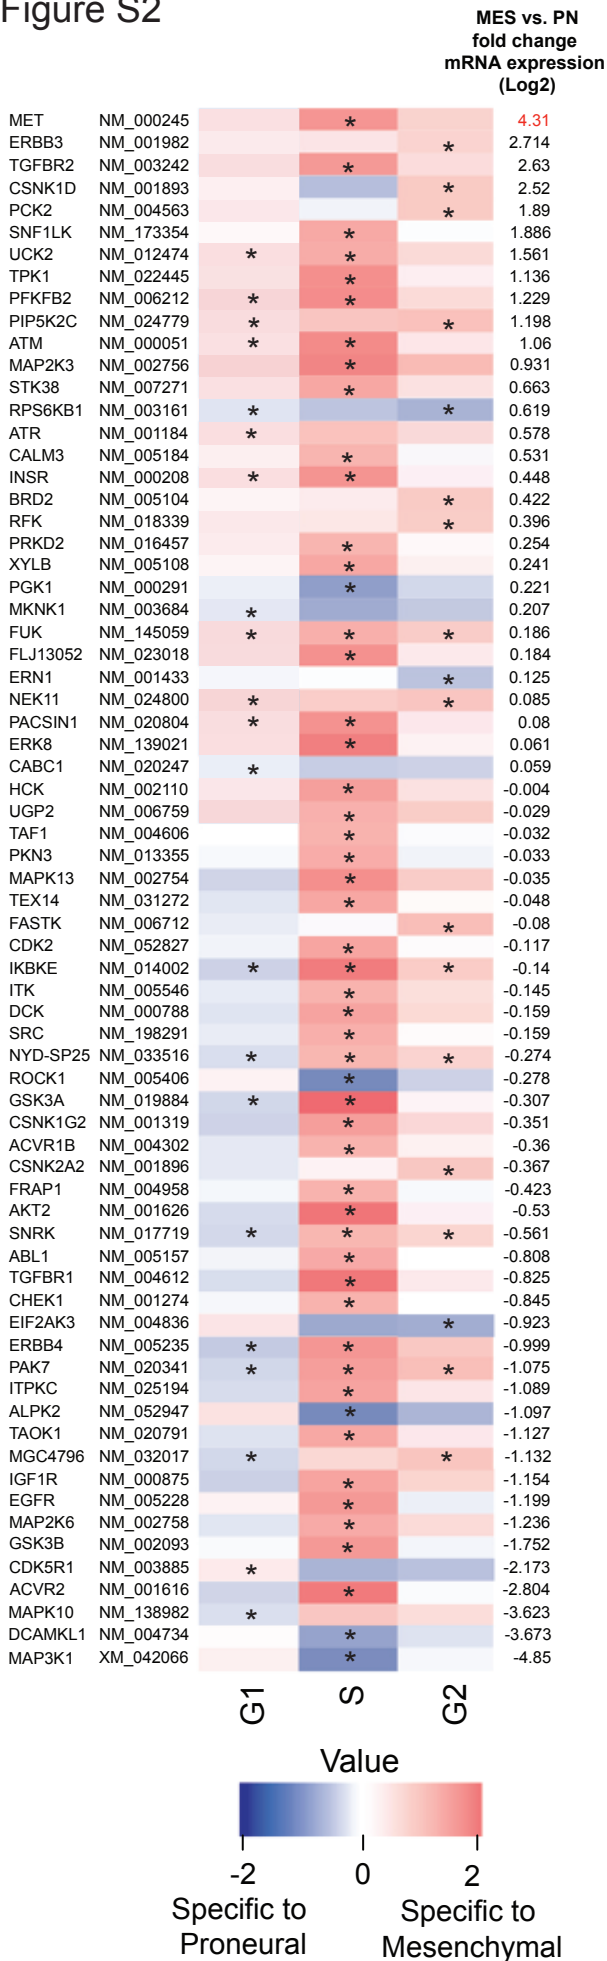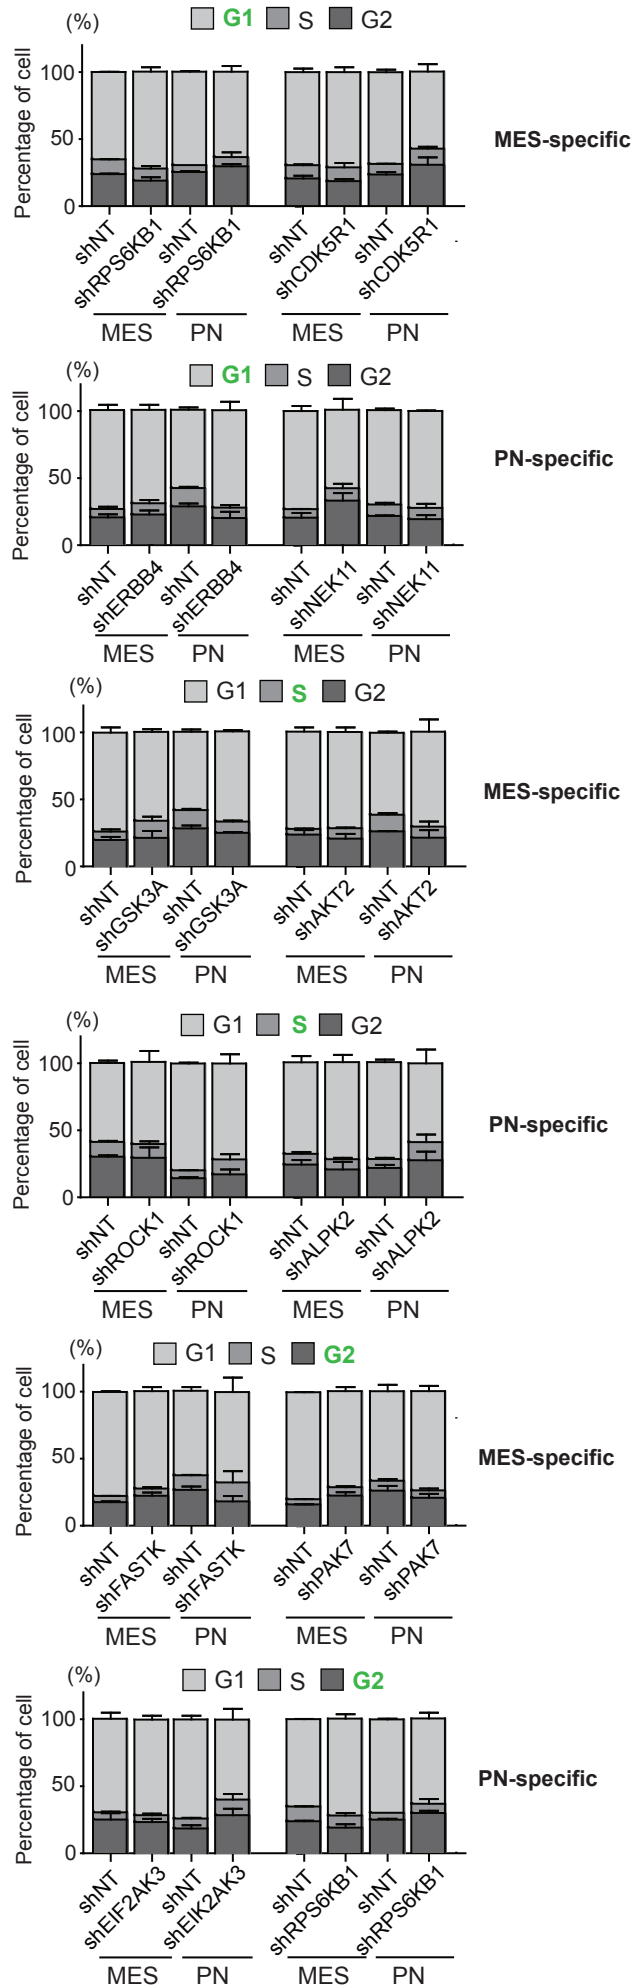

Figure S3

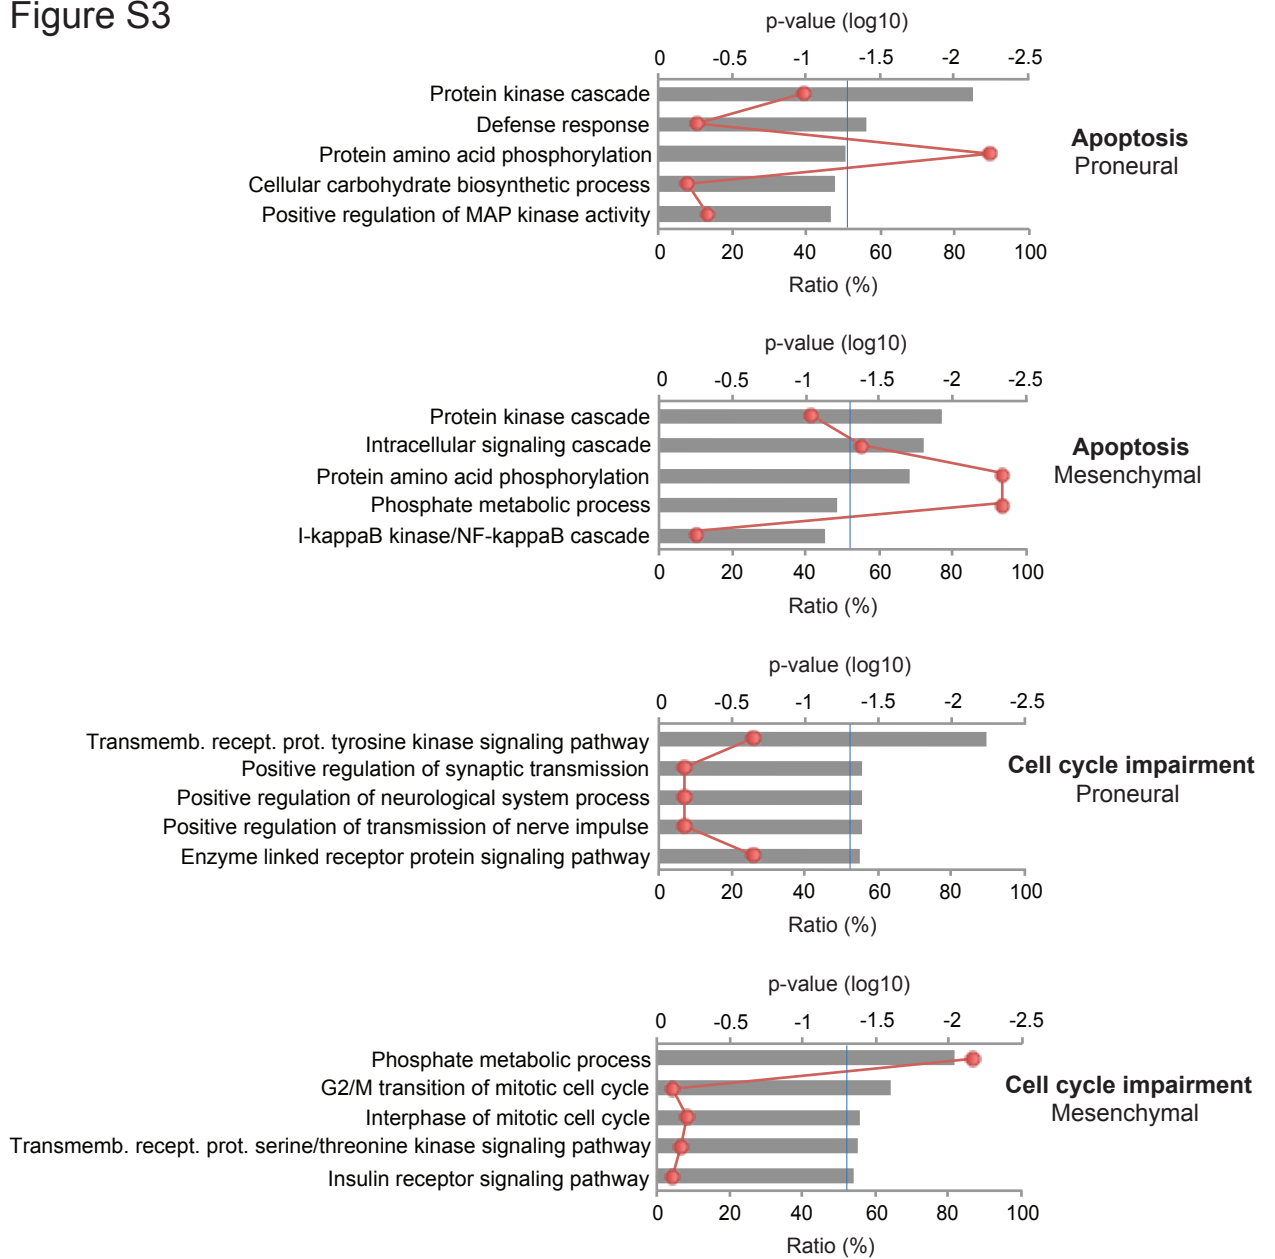

Figure S4

MES\_83  
shAXL#2

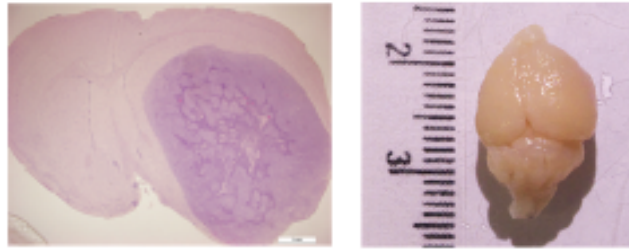

30 days

Figure S5

AXL

CD44

Hoechst

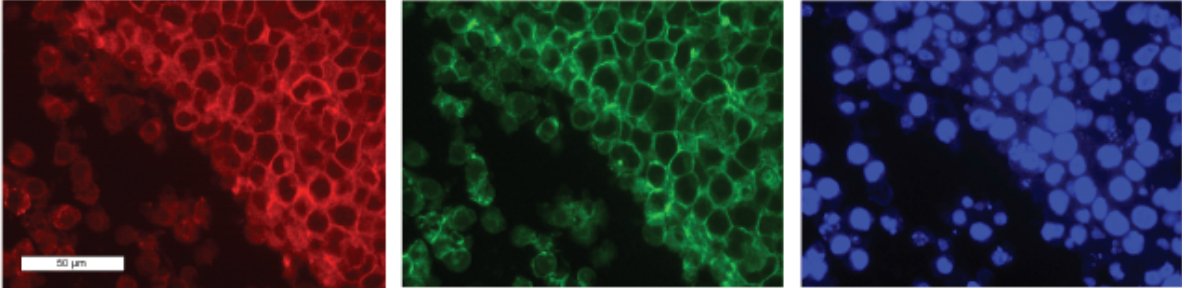

## Supplementary Figure legends

### **Figure S1: Knockdown of a subset of kinases decreases viability and alters cell cycle of both MES and PN GSCs. Related to Figure 1**

**(A)** Kinases that induce a significant level of cell death (\*:  $p < 0.05$ ) in MES and PN GSCs when targeted with shRNA. The color code represents the fold increase of SubG1 phase cells after knockdown of the indicated gene compared to cells transduced with a non-targeting shRNA (shNT).

**(B)** Kinases that significantly alter the cell cycle in MES and PN GSCs (\*.  $p < 0.05$ ) when targeted with shRNA. The color code represents the fold increase of cell numbers in the respective cell cycle phases compared to cells transduced with shNT. Stacked bar charts on the right panels represent the percentage of cells in the different phases of the cell cycle in MES and PN GSCs for the top two genes in each of the indicated cell cycle phases, as determined by FACS analysis of propidium iodide DNA staining. The average of the shNT used for normalization and the shRNAs targeting the indicated gene are shown. Error bars represent the standard deviation.

### **Figure S2: Knockdown of a subset of kinases differentially alters cell cycle in MES or PN GSCs. Related to Figure 2**

**(A)** List of kinases that significantly (\*:  $p < 0.05$ ) impair the cell cycle in MES GSCs (blue) or in PN GSCs (red) when targeted with shRNA. Data were normalized to the respective shNT. mRNA expression fold change between PN and MES GSCs is

indicated on the right side of the heatmap.

**(B)** Stacked bar charts depicting cell percentage of the top two genes in each cell cycle phase that when targeted with shRNA significantly impair the cell cycle.

Average of the shNT used for normalization and the shRNAs targeting the indicated gene are shown. Error bars represent the standard deviation.

**Figure S3: Gene ontology analysis using the DAVID tool of the candidate genes that impair MES or PN viability. Related to Figure 2**

Kinases whose silencing increases SubG1 phases (described as apoptosis kinases) were separated from those that impair G1, S or G2 phases (described as proliferation impairing kinases). The human kinome was used as background to ensure statistical correctness.

**Figure S4: Representative photographs of mice brains. Related to Figure 5**

Animals were injected with 83 GSCs transduced with shAXL#2 and representative H&E staining of shAXL mouse xenografts, 30 days after transplantation, is shown.

**Figure S5: Staining of AXL and CD44. Related to Figure 6**

Staining was performed on a mouse brain tumor sample close to a necrotic area (83 GSCs). Scale bar: 50  $\mu$ m.



## **Materials and methods**

### **Lentiviral Production and Transduction**

To assess transduction efficiency, cells on each plate were infected with lentivirus expressing green fluorescent protein (GFP). Transduction was deemed efficient if >70% cells were GFP-expressing. To reduce any position effects, the 3-5 shRNAs targeting each kinase were divided onto two plates and each plate included three replicates of a non-targeting shRNA (shNT). Measurements were standardized by the average of the shNT measurements separately for each plate. The titer was measured using lentiviral particles that contained the pLKO.1 vector expressing GFP and ranged from  $2 \times 10^6$  to  $4 \times 10^6$  Transduction Units/ml. Transductions were performed at the multiplicity of infection (MOI) of 10.

### **Reagents and Antibodies**

The following primary antibodies and reagents were used in this study: EGF (Peprotech); bFGF (Peprotech); B27 (invitrogen); Heprin (Sigma); DMEM-F12 (Gibco, 10565-018); anti-AXL (Cell signaling, #8661) for immunocytochemistry, immunofluorescence and Western blot, anti-phospho-AXL (R&D AF2228) for immunocytochemistry, immunohistochemistry and Western blot; anti-GAPDH (Abcam, ab9482) for Western blot; anti-CD44 (Cell Signaling #3570) for immunofluorescence and (Miltenyl Biotec #130-090-854) for FACS; and anti-CD133 (Biolegend #103016) for FACS. Fetal bovine serum (Gibco, 10082-147); Albumin from bovine serum (Sigma, A2153); Accutase solution (Sigma, A6964-100); alamar

Blue (Invitrogen, DAL1100); RIPA buffer (Sigma, R0278-50ml); Phosphatase inhibitor cocktail (Sigma, P0044-5ml); Protease inhibitor cocktail (P8340); Bradford (Bio-RAD, 500-0006); BSA used in Bradford assay (BioLabs, B9001S); PageRuler plus prestained protein (Thermo scientific, 26619); iScript Reverse Transcription supermix for RT-qPCR (Bio-rad, 170-8841); Caspase-Glo<sup>®</sup>3/7 Assay (Promega).

### **Western blot analysis**

The cell lysates were prepared in RIPA buffer containing protease and phosphatase inhibitor cocktail (Sigma Aldrich) on ice. The sample protein concentrations were determined by the Bradford method. Equal amounts of protein lysates (10 µg/lane) were fractionated on NuPAGE Novex 4-12% Bis-Tris Protein gel (Invitrogen) and transferred to a PVDF membrane (Invitrogen). Subsequently, the membranes were blocked with 5% skimmed milk for 1 h and then treated with the relevant antibody at 4°C overnight. Protein expression was visualized with Amersham ECL Western Blot System (GE Healthcare Life Sciences). GAPDH served as a loading control.

### **Quantitative RT-PCR**

Total RNA was prepared using a RNeasy mini kit (Qiagen) according to the manufacturer's instructions. RNA concentration was determined using a Nanodrop 2000 (Thermo scientific). RNA integrity was examined with an Agilent 2100 Bioanalyzer. For reverse transcription, the average RNA integrity number (RIN) was larger than 9.0. cDNA was synthesized by using iScript reverse transcription

supermix for RT-qPCR (Bio-rad) according to the manufacturer's protocol.

Quantitative RT-PCR was performed using a StepOnePlus real-time PCR system with a SYBR Select Master Mix (Applied Biosystems). GAPDH was used as an internal control. The following cycles were performed during DNA amplification: 94°C for 2 min, 50 cycles of 94°C (30 s), 60°C (30 s), and 72°C (40 s). The primer sequences for qPCR were as follows:

*AXL* forward: GTTTGGAGCTGTGATGGAAGGC;

*AXL* Reverse: CGCTTCACTCAGGAAATCCTCC (Gioia et al., 2011);

*CD44* forward: CCCAGATGGAGAAAGCTCTG;

*CD44* reverse: ACTTGGCTTTCTGTCCTCCA;

*CD133* Forward: ACTCCATAAAGCTGGACCCC;

*CD133* Reverse: TCAATTTTGGATTCATATGCCTT;

*GAPDH* forward: GAAGGTGAAGGTCGGAGTCA;

*GAPDH* reverse: TTGAGGTCAATGAAGGGGTC.

Relative quantitation of cDNAs to *GAPDH* was determined by  $2^{-\Delta\Delta Ct}$  method.

### **Statistical analysis**

For analysis of FACS data, measurements with less than 2000 cell counts were excluded. Measurements were standardized by the average of the non-target shRNA measurements separately for each plate. Ratios were log<sub>2</sub> transformed to more closely follow a normal distribution. Relevant kinase directed shRNAs were identified using the empirical Bayes approach (Smyth, 2004) based on moderated t-statistics

as implemented in the Bioconductor package limma (Smyth, 2005). Kinase directed shRNAs with differential activity between cell lines were identified for each cycle phase separately using one-sided p-values and a fold change (FC) threshold of the median FC plus two median absolute deviations. shRNAs showing an equivalent increase of cell number in the respective cell cycle phase in both cell lines were defined based on the following criteria: increase across cell lines was determined as for individual cell lines but based on shRNAs from both cell lines pooled using one-sided p-values and a FC threshold. The two-sided 90 % confidence interval for the difference between both cell lines was computed. Confidence limits had to fall within pre-specified boundaries in order to establish equivalence. Boundaries were defined in terms of acceptable absolute FC. Since magnitude and variability of cell number levels were very different for each cycle phase, different equivalence boundaries (FC 1.1 to 1.6) were applied for each phase. All p-values were adjusted for multiple testing using Benjamini-Hochberg correction in order to control the false discovery rate. Adjusted p-values below 0.05 were considered statistically significant. All analyses were carried out using software R 3.0.1. (Team, 2011).

### **MACS Cell Separation**

PN\_528 GSCs were separated according to their level of CD133 expression by MACS according to manufacturer's instruction. In brief, single cell suspensions were prepared with Accutase (Life technology). After 30 mins incubation with CD133 MicroBeads (Miltenyi Biotec) at 4°C, cells were added on LS columns (Miltenyi

Biotec) and placed in a MidiMACS separator. The flow-through cells were collected as CD133 low cells. The cell fraction retained in the column was eluted as CD133 high cells.

## REFERENCES

Gioia, R., Leroy, C., Drullion, C., Lagarde, V., Etienne, G., Dulucq, S., Lippert, E., Roche, S., Mahon, F.X., and Pasquet, J.M. (2011). Quantitative phosphoproteomics revealed interplay between Syk and Lyn in the resistance to nilotinib in chronic myeloid leukemia cells. *Blood* *118*, 2211-2221.

Smyth, G.K. (2004). Linear models and empirical bayes methods for assessing differential expression in microarray experiments. *Statistical applications in genetics and molecular biology* *3*, Article3.

Smyth, G.K. (2005). *Limma: linear models for microarray data* (New York: Springer).

Team, R.D.C. (2011). *R: A language and environment for statistical computing*. (Vienna, Austria: R Foundation for Statistical Computing).
